# Supplementary material for: Inhibition of buried cavities and defects in metal halide perovskite photodetectors via a two-step spin-coating method
Source: Royal Society of Chemistry journal article supplement (doi:10.1039/d2tc01033j), 2022-01-01
Supplement: d2tc01033j1.pdf [file d2tc01033j1.pdf]

## Electronic Supplementary Information

### Inhibition of buried cavities and defects in metal halide perovskite photodetectors *via* two-step spin-coating method

Silei Wang<sup>1</sup>, Tengteng Li<sup>1</sup>, Qingyan Li<sup>1</sup>, Hongliang Zhao<sup>1</sup>, Chenglong Zheng<sup>1</sup>,

Mengyao Li<sup>1</sup>, Jitao Li<sup>1</sup>, Yating Zhang<sup>1\*</sup>, Jianquan Yao<sup>1\*</sup>

<sup>1</sup> *Key Laboratory of Opto-Electronics Information Technology, Ministry of Education, School of Precision Instruments and Opto-Electronics Engineering, Tianjin University, Tianjin 300072, China.*

\*Corresponding authors' e-mail: [yating@tju.edu.cn](mailto:yating@tju.edu.cn), [jqyao@tju.edu.cn](mailto:jqyao@tju.edu.cn).

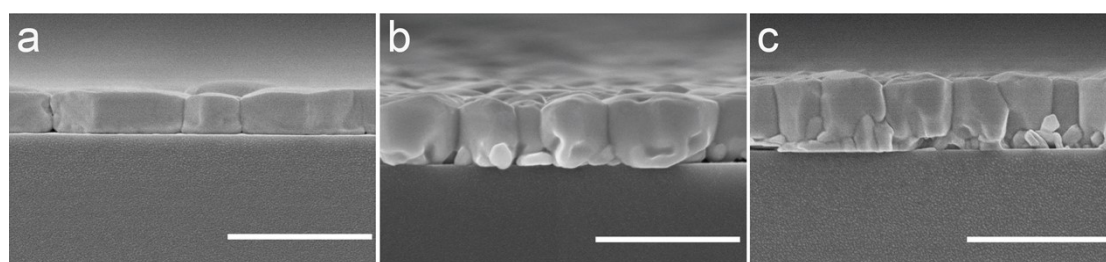

Figure S1. The cross-Section scanning electron microscope (SEM) images of perovskite prepared by (a)1 M, (b)1.3 M and (c)1.5 M  $\text{PbI}_2$  react with  $50 \text{ mg ml}^{-1}$  via the two-step spin-coating method. The scale bar is  $1 \mu\text{m}$ .

Note: With the increase of  $\text{PbI}_2$  precursor concentration, the thickness of perovskite film gradually increases. As shown in Figure S1, the grains span the perovskite film ( $\sim 310 \text{ nm}$  thickness) prepared by the 1 M  $\text{PbI}_2$  precursor. However, the nanocavities and small spherical grains appear at the bottom interface of the perovskite film ( $\sim 430 \text{ nm}$  thickness) prepared by the 1.3 M  $\text{PbI}_2$  precursor, and the perovskite film ( $\sim 510 \text{ nm}$  thickness) in Figure S1c is even worse.

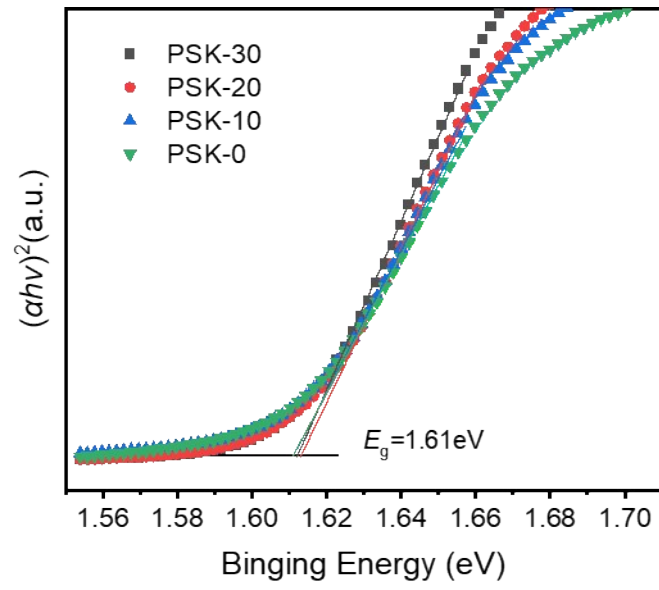

Figure S2. The band gap of perovskite film was calculated by Tauc Plot method

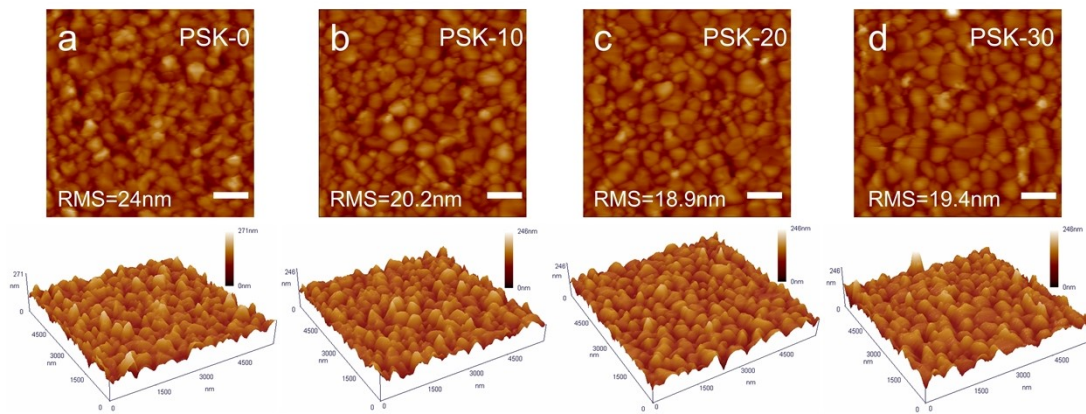

Figure S3. The atomic force microscope (top row) and 3D topography (bottom row) of the PSK- $x$  ( $x=0, 10, 20$  and  $30$ ), respectively. The root mean square (RMS) in the inset is the effective value of surface roughness. The scale bar is  $1\mu\text{m}$ . The RMS value of surface roughness for PSK- $x$  ( $x=0, 10, 20$  and  $30$ ) varies from  $24$  to  $19.4$  nm with the increase of MAI introduction.

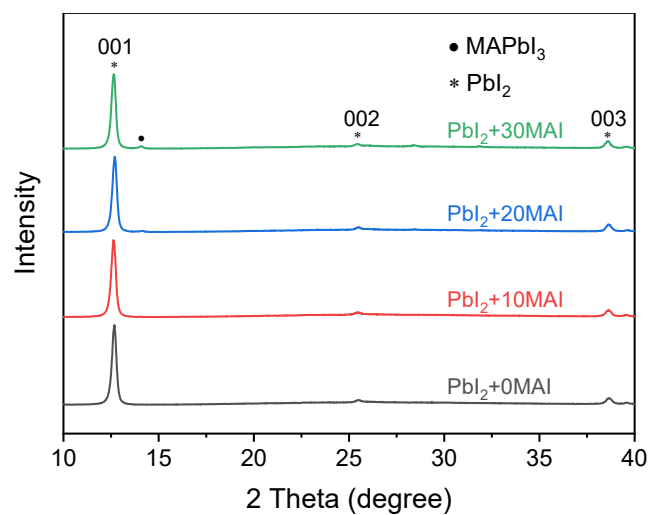

Figure S4. The XRD patterns of the  $\text{PbI}_2+x\text{MAI}$  ( $x=0, 10, 20$  and  $30$ ), respectively. The weak  $\text{MAPbI}_3$  peak can be observed on the substrate surface after the introduction of MAI.

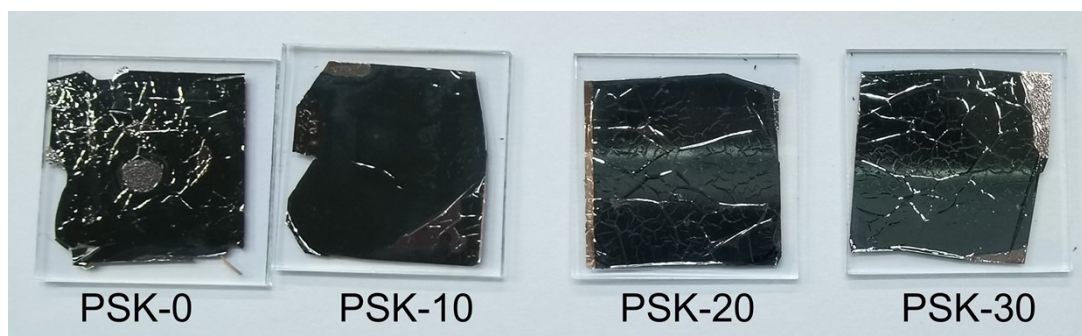

Figure S5. Optical image of PSK- $x$  ( $x=0, 10, 20, 30$ ) film after the lift-off process, respectively.

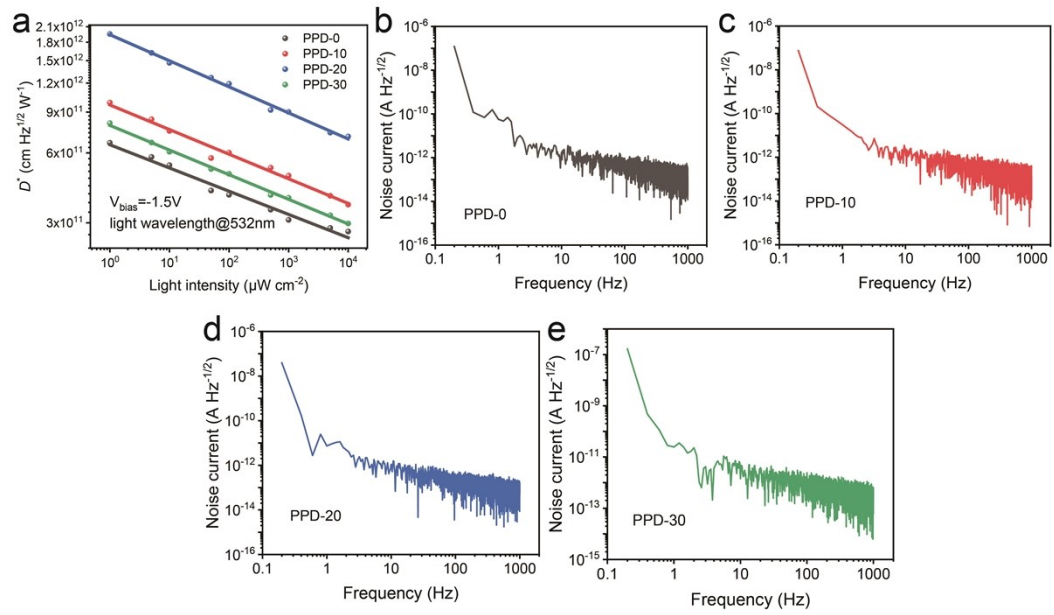

Figure S6. (a) The  $D^*$  of all PPDs calculated based on equation (4) under an applied voltage of  $-1.5\text{ V}$ . The  $i_n$  measured of is PPD-0, PPD-10, PPD-20 and PPD-30 are shown in Figures (b), (c), (d) and (e), respectively.

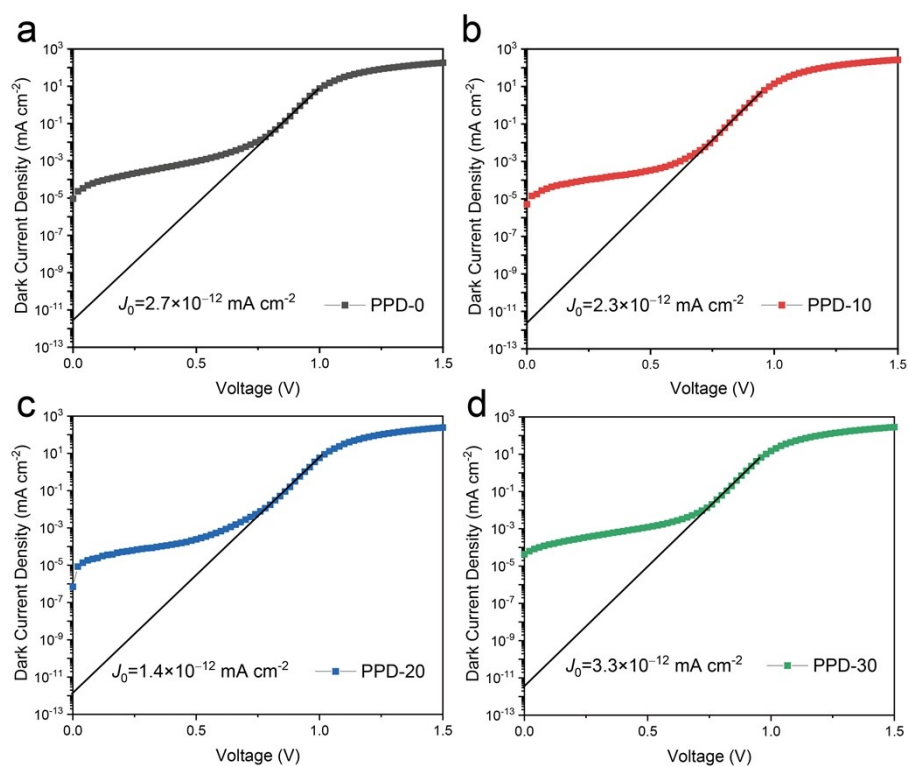

Figure S7. Semi-log plots of dark current densities versus voltage and the linear fitting for reverse saturation extraction. (a) PPD-0, (b) PPD-10, (c) PPD-20 and (d) PPD-30.

Table S1. Summary of performances of PPDs.

| Device structure                                                                                                                                  | R<br>(bias, light source<br>& intensity)                                  | Detectivity<br>( $D^*$ , Jones)                                       | Response<br>time<br>( $T_{rise}/T_{fall}$ ) | LDR<br>(dB) | Ref.         |
|---------------------------------------------------------------------------------------------------------------------------------------------------|---------------------------------------------------------------------------|-----------------------------------------------------------------------|---------------------------------------------|-------------|--------------|
| ITO/PEPDOT:PSS/FA <sub>0.85</sub> Cs <sub>0.15</sub> Sn <sub>0.5</sub> Pb <sub>0.5</sub> I <sub>3</sub><br>/PC <sub>61</sub> BM/ZrAcac/Ag         | 0.53 A W <sup>-1</sup><br>(940 nm)                                        | 6 × 10 <sup>12</sup><br>(940 nm)                                      | 0.86 μs.                                    | 103         | 1            |
| ITO/NiO <sub>x</sub> :PbI <sub>2</sub> /MAPbI <sub>3</sub> /C60/BCP/Ag.                                                                           | 0.5 A W <sup>-1</sup><br>(~750 nm)                                        | 6 × 10 <sup>12</sup>                                                  | 168 ns                                      | 112         | 2            |
| ITO/SnO <sub>2</sub> /(FAPbI <sub>3</sub> ) <sub>0.97</sub> (MAPbBr <sub>3</sub> ) <sub>0.03</sub> /Spiro-MeoTAD/Au                               | —                                                                         | 1.2 × 10 <sup>12</sup>                                                | 3/6 μs<br>(-0.5 V)                          | 80          | 3            |
| ITO/SnO <sub>x</sub> /PC <sub>61</sub> BM/Cs <sub>0.18</sub> FA <sub>0.82</sub> Pb(I <sub>0.82</sub> Br <sub>0.18</sub> ) <sub>3</sub> /PTAA/MoCr | 0.36 A W <sup>-1</sup><br>(-0.5 V, 680 nm)                                | 2.1 × 10 <sup>13</sup><br>(-0.5 V, 680 nm)                            | 2.7/2.3 μs                                  | —           | 4            |
| ITO/PTAA/ MAPbI <sub>3</sub> /IEICO/C <sub>60</sub> /BCP/Cu                                                                                       | 0.28 A W <sup>-1</sup><br>(0 V, 650 nm)                                   | 1.45 × 10 <sup>12</sup><br>(650 nm)                                   | 27 ns                                       | 198         | 5            |
| ITO/PTAA/MAPbI <sub>3</sub> /F8IC:PTB7-Th/ C <sub>60</sub> / BCP/<br>Cu                                                                           | 0.43 A W <sup>-1</sup><br>(0 V, 710 nm)                                   | 2.3 × 10 <sup>11</sup><br>(0 V, 870 nm)                               | 35/20 μs                                    | 191         | 6            |
| ITO/PEDOT:PSS/MAPbI <sub>3-x</sub> Cl <sub>x</sub> /PC <sub>61</sub> BM/PFN/Al                                                                    | —                                                                         | 4 × 10 <sup>14</sup><br>(0 V, 550 nm)                                 | 180/160 ns                                  | 100         | 7            |
| FTO/CdS/MAPbI <sub>3</sub> /Spiro-OMeTAD/Ag                                                                                                       | 0.48 A W <sup>-1</sup><br>(0 V, 700nm)                                    | 2.1 × 10 <sup>13</sup><br>(0 V, 700 nm)                               | 0.54/2.21<br>ms                             | —           | 8            |
| FTO/SrTiO <sub>3</sub> /MAPbI <sub>3</sub> / Spiro-OMeTAD/Ag                                                                                      | 0.73 A W <sup>-1</sup><br>(0 V, 550 nm)                                   | —                                                                     | 100 ms                                      | —           | 9            |
| ITO/OTPD/MAPbI <sub>3</sub> /PCBM/C <sub>60</sub> /Al                                                                                             | 0.21 A W <sup>-1</sup><br>(-0.1 V, white<br>light)                        | 7.4 × 10 <sup>12</sup><br>(-0.1 V, 680 nm,)                           | 120 ns                                      | 94          | 10           |
| ITO/MAPbI <sub>3</sub> /TPD-Si <sub>2</sub> /MoO <sub>3</sub> /Ag                                                                                 | 242 A W <sup>-1</sup><br>(-1 V, 740 nm)                                   | —                                                                     | 10 μs                                       | 85          | 11           |
| ITO/PTAA/MAPbI <sub>3</sub> /C <sub>60</sub> /BCP/Cu                                                                                              | 0.47 A W <sup>-1</sup><br>(0 V, 680 nm)                                   | 7.8 × 10 <sup>12</sup><br>(0 V, 700 nm)                               | 0.95 ns                                     | —           | 12           |
| ITO/PTAA/MAPbI <sub>3</sub> /PDPPTDPT:PCBM/BCP/C<br>u                                                                                             | —                                                                         | 10 <sup>11</sup><br>(-0.2 V, 900 nm)                                  | 5ns                                         | 95          | 13           |
| TETA-GR/MoS <sub>2</sub> /MAPbI <sub>3</sub> /PTAA/Au                                                                                             | 0.42 A W <sup>-1</sup><br>(0 V, ~750 nm)                                  | 1.1 × 10 <sup>10</sup><br>(0 V, 532 nm)                               | 1.63/0.98<br>μs                             | 112         | 14           |
| co-GR/MoS <sub>2</sub> /MAPbI <sub>3</sub> /PCBM/BCP/Al                                                                                           | 0.41 A W <sup>-1</sup><br>(0 V, 700 nm, 407<br>μW cm <sup>-2</sup> )      | 8 × 10 <sup>10</sup><br>(0 V, 700 nm, 407<br>μW cm <sup>-2</sup> )    | 800/500 ms                                  | 117         | 15           |
| TFSA-<br>GR/PEDOT:GQDs/MAPbI <sub>3</sub> :GQDs/PCBM/BCP/A<br>l                                                                                   | 0.44 A W <sup>-1</sup><br>(0 V, ~700 nm)                                  | 8.7 × 10 <sup>12</sup><br>(0 V, ~700 nm)                              | 0.56/0.96<br>μs                             | 100         | 16           |
| ITO/PET/PDMS/ITO/PET/MAPbI <sub>3</sub> / Au                                                                                                      | 0.418 A W <sup>-1</sup><br>(1 V, white light,<br>10 μW cm <sup>-2</sup> ) | 1.2 × 10 <sup>13</sup>                                                | 80/80 ms                                    | —           | 17           |
| ITO/PEDOT:PSS/MAPbI <sub>3</sub> /PC <sub>61</sub> BM/C <sub>60</sub> /LiF/Ag                                                                     | —                                                                         | 3.0 × 10 <sup>12</sup><br>(1 V, 700 nm)                               | 1.7/1 μs                                    | 170         | 18           |
| ITO/PEDOT:PSS/MAPbI <sub>3</sub> /PC <sub>61</sub> BM/BCP/Au<br>(PPD-0, PPD-10, PPD-20, PPD-30)                                                   | 0.5 A W <sup>-1</sup>                                                     | 6.6 × 10 <sup>11</sup>                                                |                                             |             |              |
|                                                                                                                                                   | 0.66 A W <sup>-1</sup>                                                    | 9.9 × 10 <sup>11</sup>                                                | 3.1/74.5 μs                                 | 86          |              |
|                                                                                                                                                   | 0.79 A W <sup>-1</sup>                                                    | 1.95 × 10 <sup>12</sup>                                               | 2.8/73.6 μs                                 | 100         | This<br>work |
|                                                                                                                                                   | 0.74 A W <sup>-1</sup><br>(-1.5 V, 532 nm,<br>1 μW cm <sup>-2</sup> )     | 8.1 × 10 <sup>11</sup><br>(-1.5 V, 532 nm,<br>1 μW cm <sup>-2</sup> ) | 2.6/72.8 μs<br>2.3/76.7 μs                  | 106<br>86   |              |

## References

1. H. Liu, H. L. Zhu, Z. Wang, X. Wu, Z. Huang, M. R. Huqe, J. A. Zapfen, X. Lu and W. C. H. Choy, *Advanced Functional Materials*, 2021, **31**, 2010532.
2. H. L. Zhu, J. Cheng, D. Zhang, C. Liang, C. J. Reckmeier, H. Huang, A. L. Rogach and W. C. Choy, *ACS Nano*, 2016, **10**, 6808-6815.
3. Y. Wang, X. Zhang, Q. Jiang, H. Liu, D. Wang, J. Meng, J. You and Z. Yin, *ACS Applied Materials & Interfaces*, 2018, **10**, 6505-6512.
4. A. J. J. M. van Breemen, R. Ollearo, S. Shanmugam, B. Peeters, L. C. J. M. Peters, R. L. van de Ketterij, I. Katsouras, H. B. Akkerman, C. H. Frijters, F. Di Giacomo, S. Veenstra,



- R. Andriessen, R. A. J. Janssen, E. A. Meulenkamp and G. H. Gelinck, *Nature Electronics*, 2021, **4**, 818-826.
5. C. Li, J. Lu, Y. Zhao, L. Sun, G. Wang, Y. Ma, S. Zhang, J. Zhou, L. Shen and W. Huang, *Small*, 2019, **15**, 1903599.
  6. C. Li, H. Wang, F. Wang, T. Li, M. Xu, H. Wang, Z. Wang, X. Zhan, W. Hu and L. Shen, *Light Sci Appl*, 2020, **9**, 31.
  7. L. Dou, Y. M. Yang, J. You, Z. Hong, W. H. Chang, G. Li and Y. Yang, *Nat Commun*, 2014, **5**, 5404.
  8. F. Cao, L. Meng, M. Wang, W. Tian and L. Li, *Adv Mater*, 2019, **31**, 1806725.
  9. F. Cao, W. Tian, M. Wang and L. Li, *ACS Photonics*, 2018, **5**, 3731-3738.
  10. Y. Fang and J. Huang, *Adv Mater*, 2015, **27**, 2804-2810.
  11. R. Dong, Y. Fang, J. Chae, J. Dai, Z. Xiao, Q. Dong, Y. Yuan, A. Centrone, X. C. Zeng and J. Huang, *Adv Mater*, 2015, **27**, 1912-1918.
  12. L. Shen, Y. Fang, D. Wang, Y. Bai, Y. Deng, M. Wang, Y. Lu and J. Huang, *Adv Mater*, 2016, **28**, 10794-10800.
  13. L. Shen, Y. Lin, C. Bao, Y. Bai, Y. Deng, M. Wang, T. Li, Y. Lu, A. Gruverman, W. Li and J. Huang, *Materials Horizons*, 2017, **4**, 242-248.
  14. D. H. Shin, J. S. Ko, S. K. Kang and S.-H. Choi, *ACS Appl Mater Interfaces*, 2020, **12**, 4586-4593.
  15. D. H. Shin, S. H. Shin and S.-H. Choi, *Applied Surface Science*, 2020, **514**.
  16. D. H. Shin, S. H. Shin, S. G. Lee, S. Kim and S.-H. Choi, *ACS Sustainable Chemistry & Engineering*, 2019, **7**, 19961-19968.
  17. S. F. Leung, K. T. Ho, P. K. Kung, V. K. S. Hsiao, H. N. Alshareef, Z. L. Wang and J. H. He, *Adv Mater*, 2018, **30**, 1704611.
  18. Q. Lin, A. Armin, D. M. Lyons, P. L. Burn and P. Meredith, *Adv Mater*, 2015, **27**, 2060-2064.
